# Supplementary material
Source: Royal Society of Chemistry journal article supplement (doi:10.1039/d6qo00284f)
Supplement: d6qo00284f2.pdf [file d6qo00284f2.pdf]

Supporting Information 2, the underlying raw images of all  
electrophoresis and the raw WB imaging data for

**Design of 365 nm-Light-triggered Fluorogenic Crosslinking via  
a Genetically Encoded 3-CF<sub>3</sub>-*p*-phenylenediamine-Lysine  
Featuring Red-shifted Photo-defluorination**

Fan Zhang, Ziming Xiong, Siyu Kuang, Sitong Li, Xiaohu Zhao, and Zhipeng Yu\*

Key Laboratory of Green Chemistry and Technology of Ministry of Education,  
College of Chemistry, Sichuan University, 29 Wangjiang Road,  
Chengdu 610064, P. R. China

Email: [zhipeng@scu.edu.cn](mailto:zhipeng@scu.edu.cn)

The RAW SDS-PGE image

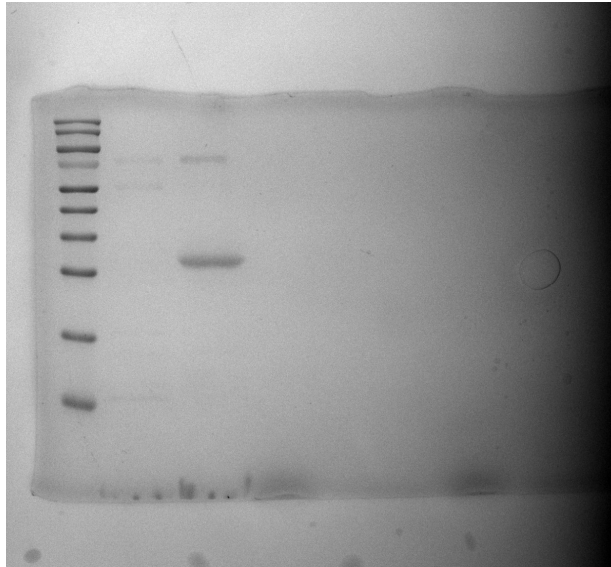

The labelled SDS-PGE image

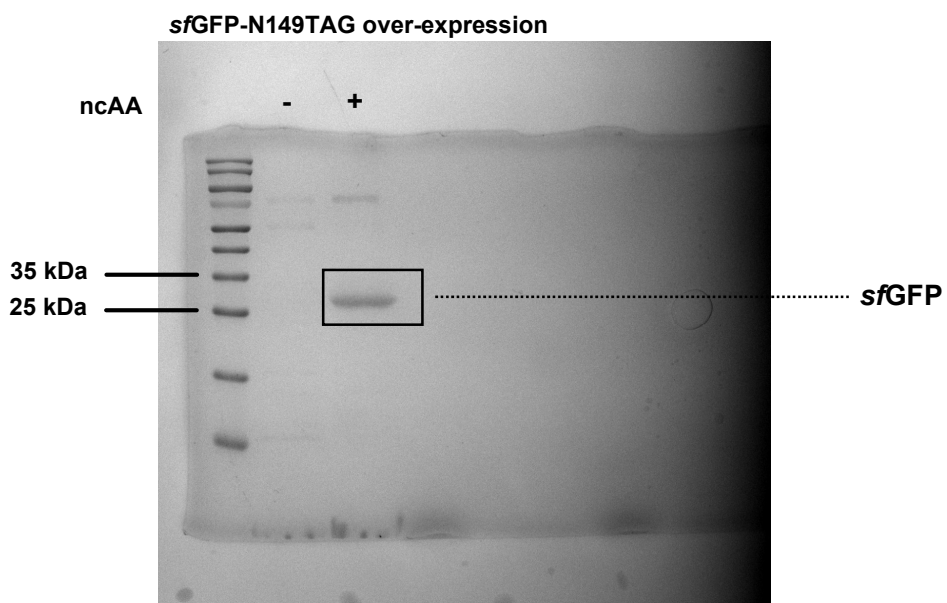

**Figure 2c.** The raw image for the SDS-PAGE analysis of the purified sfGFP-N149U expressed with *MmPylRS* (Y306A, C348A) in *E. coil*. Conditions: 2.0 mM ncAA, followed by Coomassie blue staining. ncAA = U = **3-CF<sub>3</sub>-PDAK**

The RAW SDS-PGE image

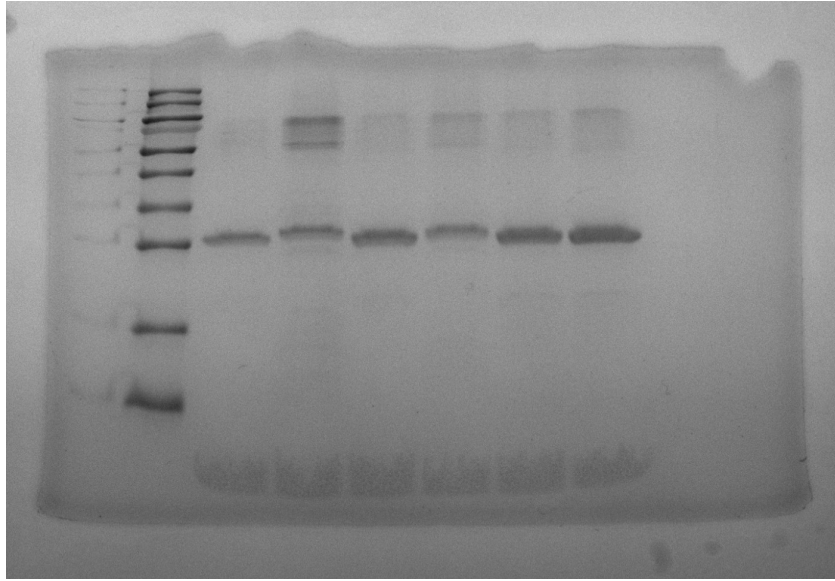

The labelled SDS-PGE image

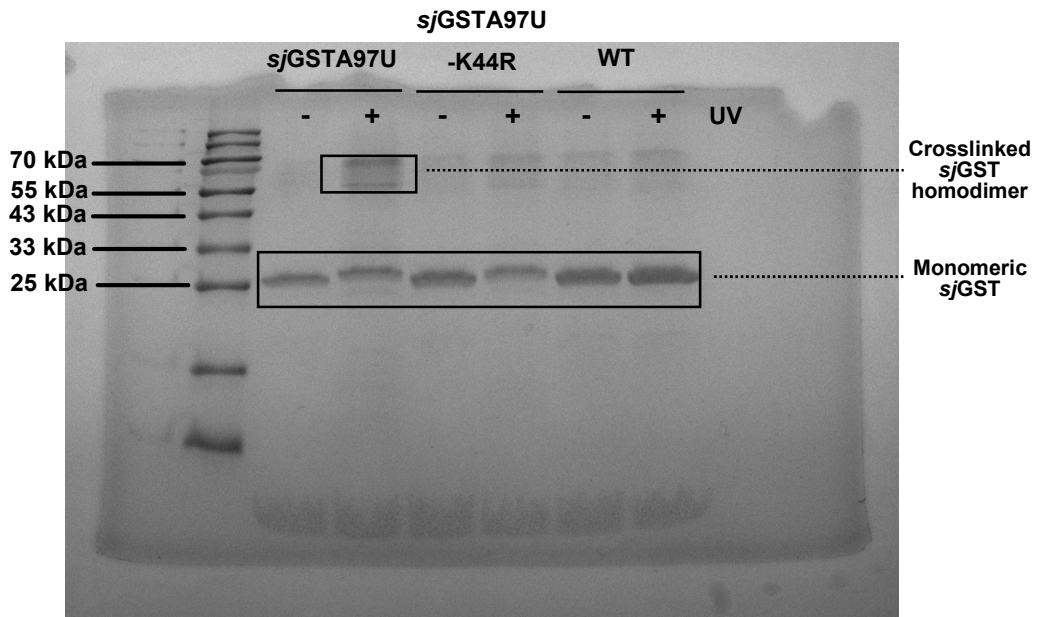

The RAW SDS-PGE image

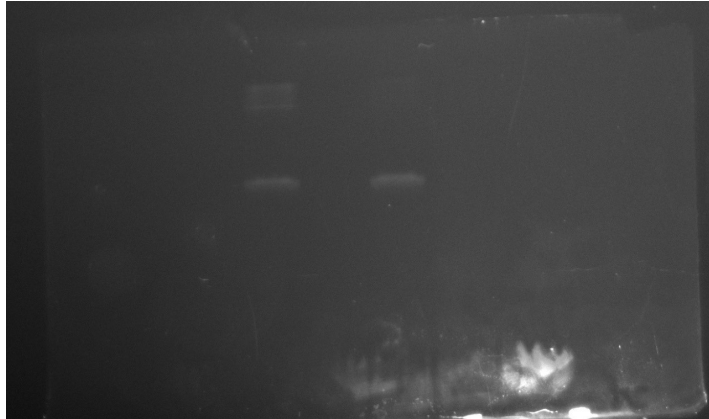

The labelled SDS-PGE image

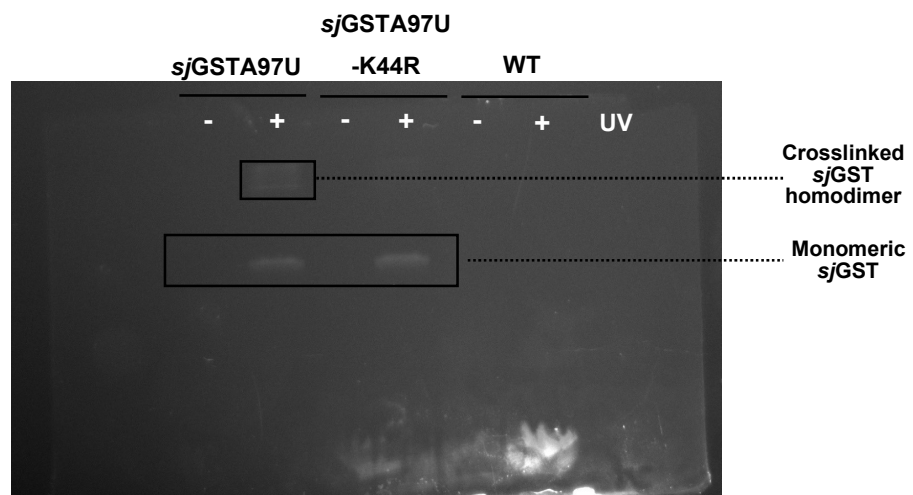

**Figure 3f.** The raw images for the SDS-PAGE analysis and in-gel fluorescence of the purified *sjGST-A97U*, *sjGST-A97U-K44R*, and *sjGST<sub>wt</sub>*. Conditions: with and without UV light (365 nm for 20 s), followed by Coomassie brilliant blue staining. U = **3-CF<sub>3</sub>-PDAK**

The RAW SDS-PGE image

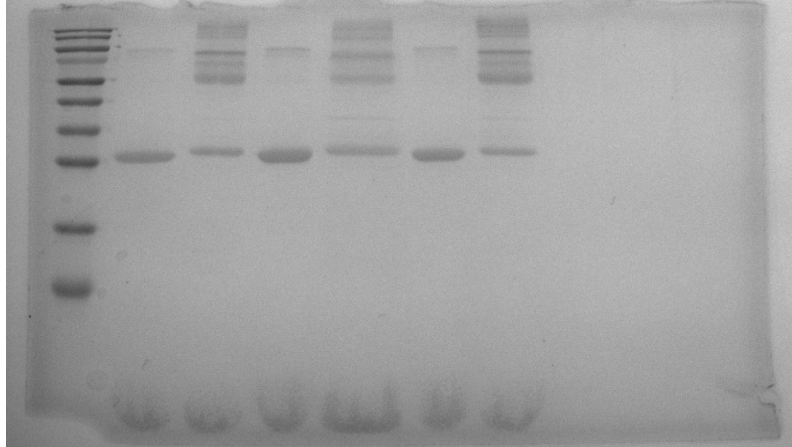

The labelled SDS-PGE image

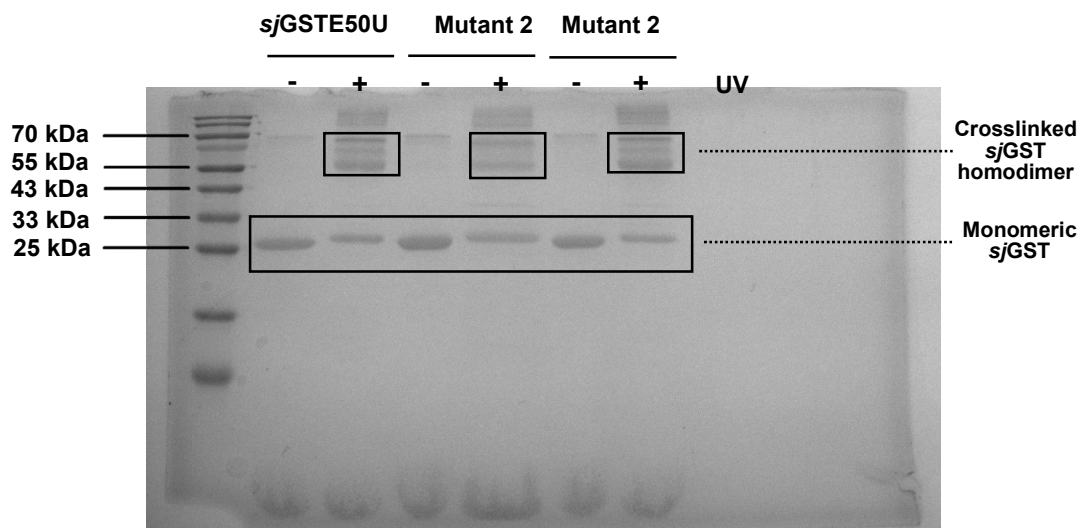

The RAW SDS-PGE image

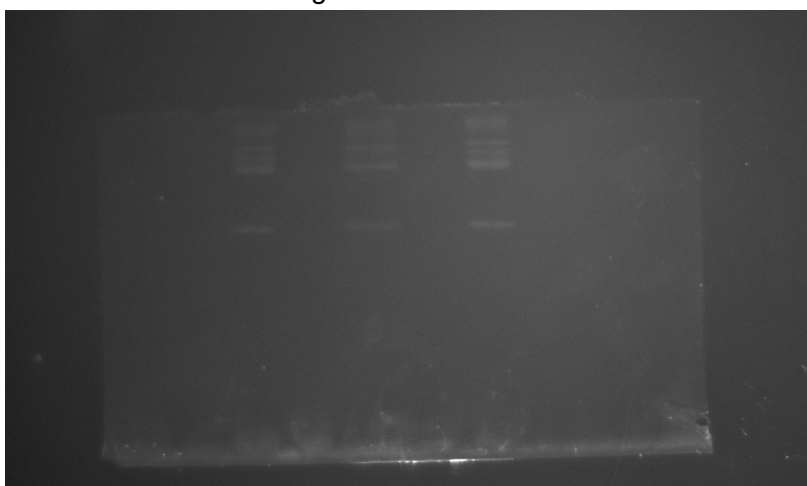

The labelled SDS-PGE image

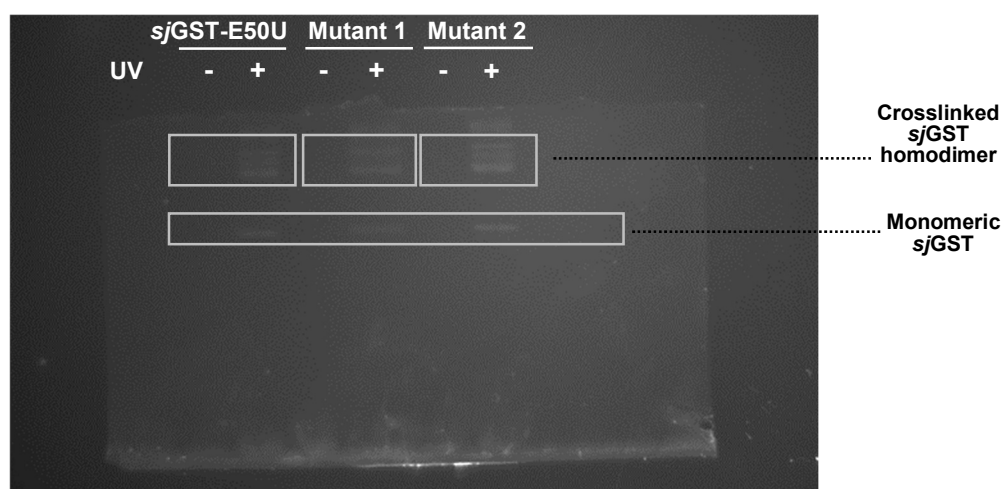

**Figure S17.** The raw images for the SDS-PAGE analysis and in-gel fluorescence of the purified *sj*GST-E50U and mutant 1 and mutant 2. Conditions: with and without UV light (365 nm for 20 s), followed by Coomassie brilliant blue staining. Mutant 1 refers to *sj*GST carrying the E50U/K43R/K44R/K64R mutations. Mutant 2 refers to *sj*GST carrying the E50U/K86R/K124R/K130R/K139R mutations. U = **3-CF<sub>3</sub>-PDAK**.

The RAW SDS-PGE image

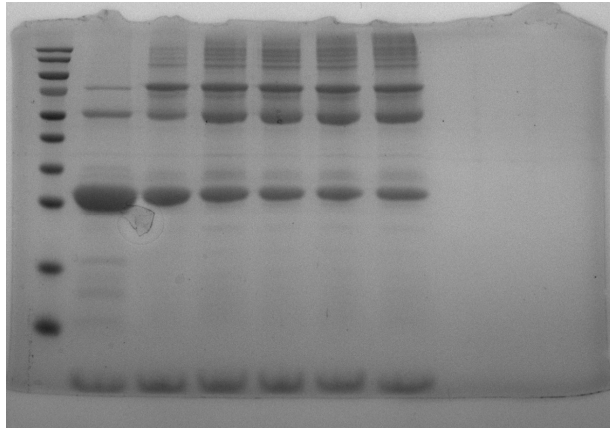

The labelled SDS-PGE image

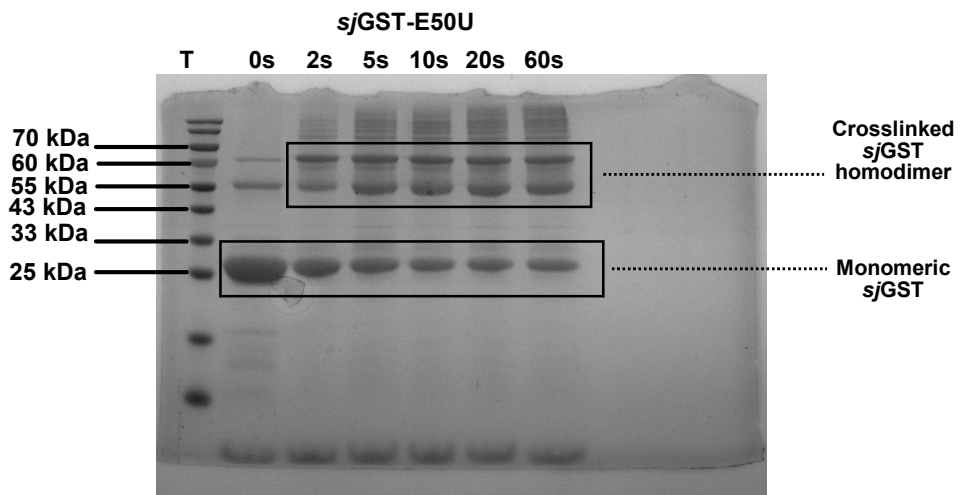

The RAW SDS-PGE image

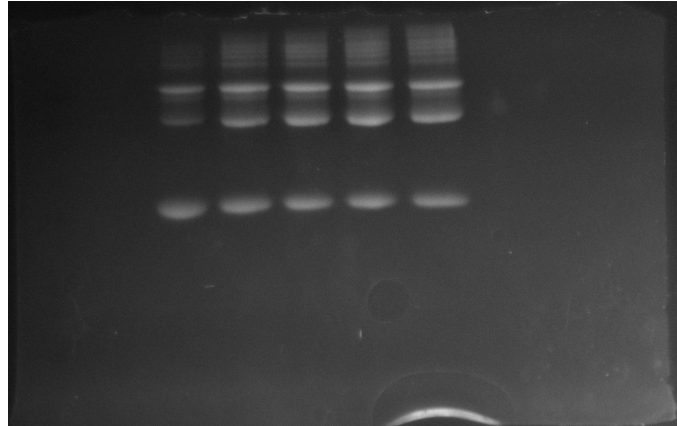

The labelled SDS-PGE image

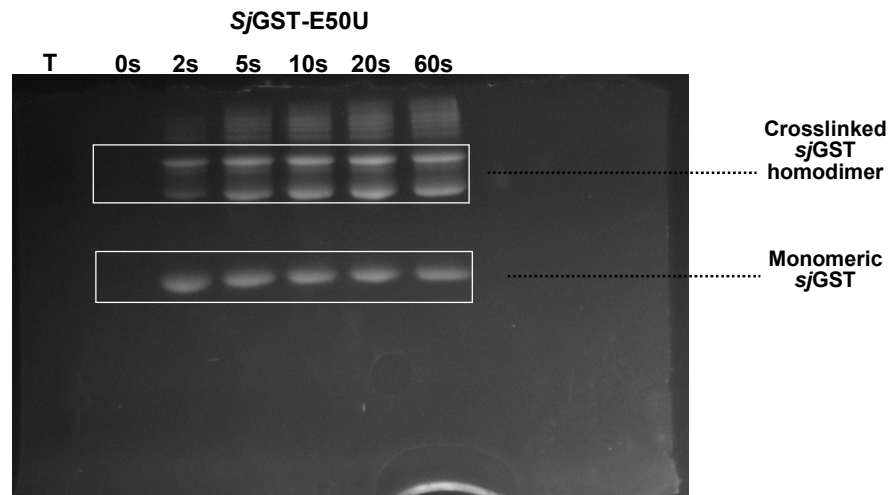

**Figure 3a.** The raw images for the SDS-PAGE analysis and in-gel fluorescence of time-dependent photo-crosslinking of the purified *sj*GST-E50U, followed by Coomassie brilliant blue staining. U = **3-CF<sub>3</sub>-PDAK**.

The RAW SDS-PGE image

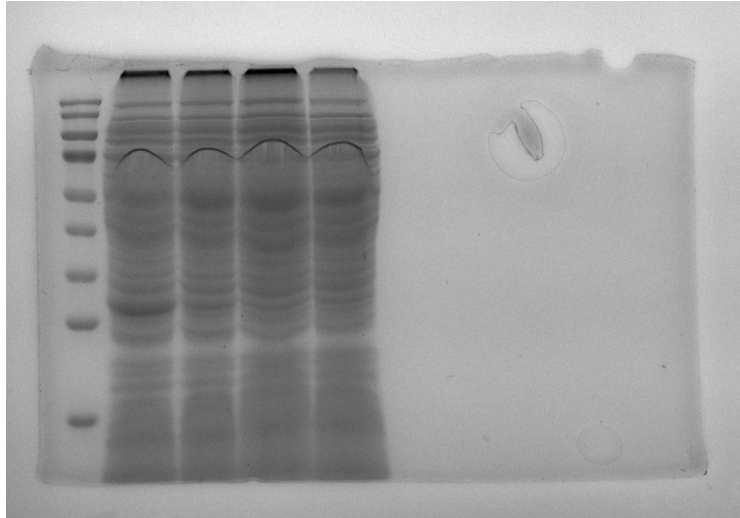

The labelled SDS-PGE image

Living BL21(DE3) cells expressing *sjGST-E50TAG*

|      |   |   |   |   |
|------|---|---|---|---|
| ncAA | + | + | - | - |
| UV   | - | + | - | + |

70 kDa —  
60 kDa —  
55 kDa —  
43 kDa —  
33 kDa —  
25 kDa —

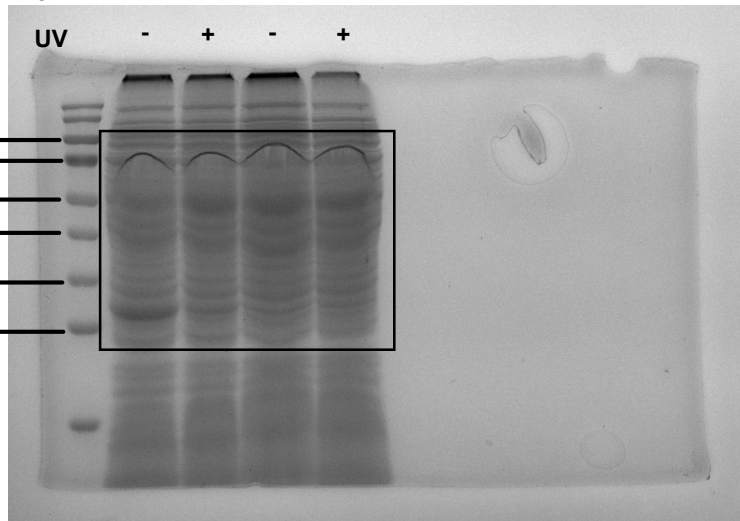

The RAW SDS-PGE image

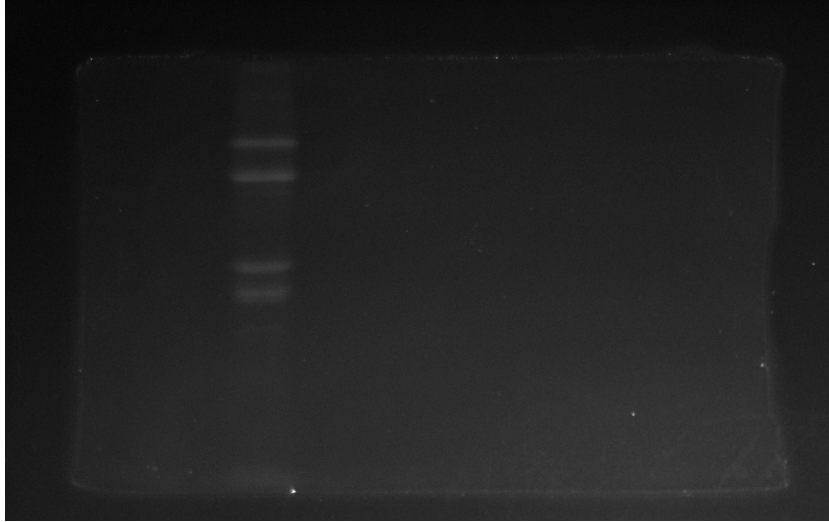

The labelled SDS-PGE image

Living BL21(DE3) cells expressing *sjGST-E50TAG*

|      |   |   |   |   |
|------|---|---|---|---|
| ncAA | + | + | - | - |
| UV   | - | + | - | + |

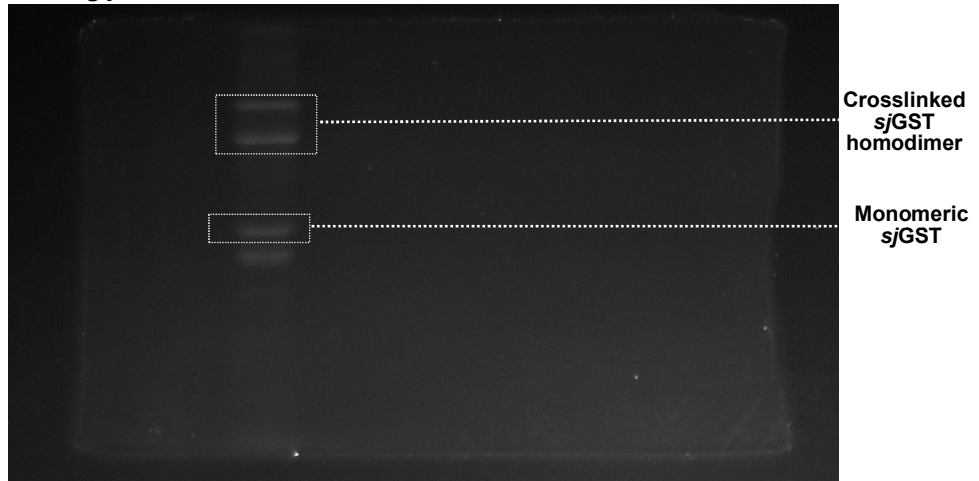

The RAW image of the PVDF membrane for WB analysis

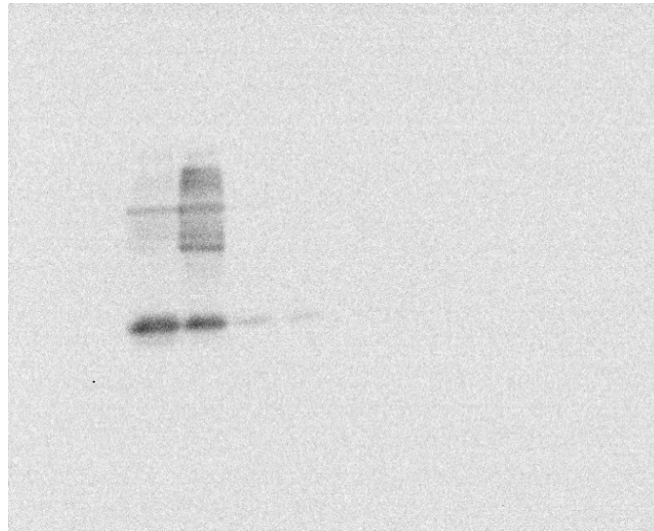

The labelled RAW image of the PVDF membrane for WB analysis

Living BL21(DE3) cells expressing *sjGST-E50TAG*

|      |   |   |   |   |
|------|---|---|---|---|
| ncAA | + | + | - | - |
| UV   | - | + | - | + |

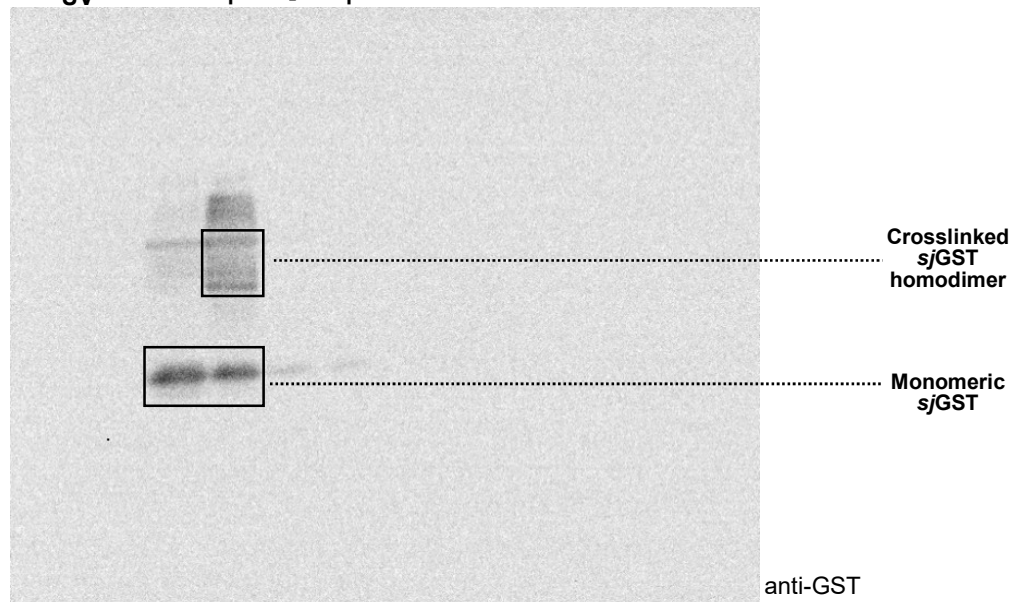

**Figure 3b.** The raw images for the SDS-PAGE, in-gel fluorescence and western blot (on PVDF membrane) analysis for the in photo-crosslinking of *sjGST*E50U in living BL21(DE3) cells. U = **3-CF<sub>3</sub>-PDAK**.

The RAW image of the PVDF membrane for WB analysis

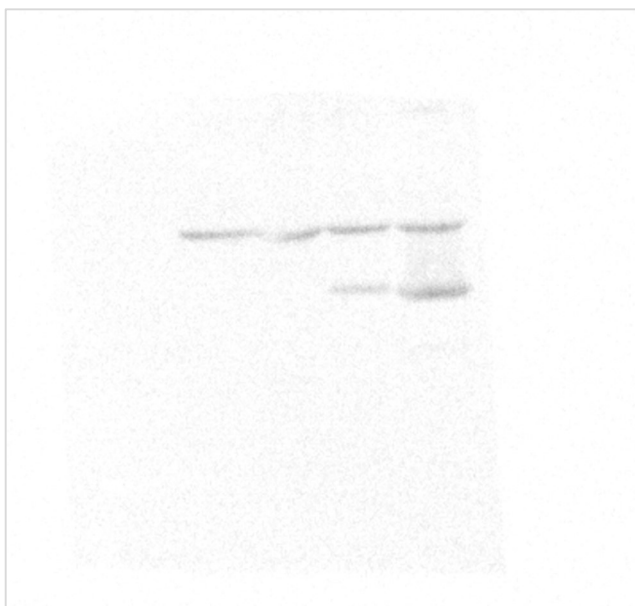

The labelled RAW image of the PVDF membrane for WB analysis

|                  |   |   |   |   |
|------------------|---|---|---|---|
| <b>ncAARS</b>    | - | + | + | - |
| <b>ncAA</b>      | - | - | + | - |
| <b>wild type</b> | - | - | - | + |

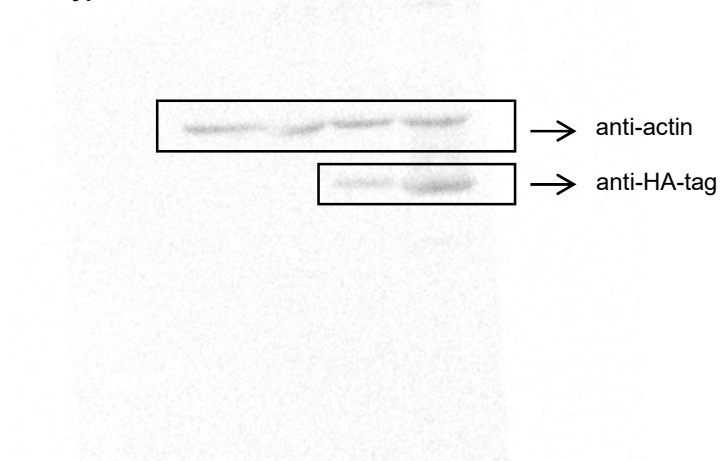

**Figure S18.** The raw image for the western blot (on PVDF membrane) analysis to verify the full-length expression of EGFP-N149TAG-HA in HEK293T. Protein samples were lysed from the HEK293T cells transfected with or without plasmid, and with adding of 2.0 mM **3-CF<sub>3</sub>-PDAK** or not. The PVDF membrane was incubated with anti-HA-tag mouse monoclonal antibody (1:500) and anti- $\beta$ -actin mouse monoclonal antibody (1:1000), followed by washing and incubating with HRP-labelled Goat anti-Mouse IgG (H+L) secondary antibody (1:1000), which was further incubated with ECL substrate for chemiluminescence imaging.
